# Supplementary material for: Cross-Cultural Validation of the Cognitive Biases Questionnaire for Psychosis in Japan and Examination of the Relationships Between Cognitive Biases and Schizophrenia Symptoms
Source: Springer Nature journal article supplement (doi:10.1007/s10608-016-9807-8), 2016-10-07
Supplement: MOESM1 [file 10831814]

Supplementary Information:

Japanese version of Cognitive Biases Questionnaire for Psychosis (CBQp)

サイコーシス認知バイアス質問紙

この質問紙には日常的な出来事についての文章が並んでいます。それぞれの出来事に対して人がとるかもしれない反応としてA、B、Cの３通りの回答が用意されています。実際に自分に起こった出来事のように、できるだけはっきりと想像してみてください。

その出来事を「もし自分が実際に体験したらどのように考えるか」で３つの回答のなかから最も適切な答えを選んでください。３つともどうもぴったりこないと思ったら、あなたの考えに一番近いものを選んでください。また、回答を１つに決められないと思ったら、あなたが一番頻繁に考えそうなものを選んでください。選んだ回答のアルファベットに丸をつけてください。

　正しい答えや間違った答えはありませんから、あなたが真っ先に頭に思い浮かべる考えに最も近い回答をできるだけ早く選んでください。

次の出来事を想像して、あなたの考えに一番あてはまるものに丸をつけてください

| １． 手紙を受け取ったが、封がされていないことに気づいた。  *（A、B、Cのどれかに〇をつけてください）* | A：私が受け取る前に誰かがわざと封を開けた。  B：手紙を書いた人が、一旦手紙を書いた後に、何らかの理由で封を開けたのかな。  C：なんとも思わない。 |
| --- | --- |
| ２．街を歩いていると、自分の名前を呼ばれたので、振り返ってみるが誰もいなかった。  *（A、B、Cのどれかに〇をつけてください）* | A：何か変なことが起きている。  B：これには、何かとても危険なことが関係している。  C：思い過ごしだろう。 |
| ３．食べ物の味がいつもと違っていた。  *（A、B、Cのどれかに〇をつけてください）* | A:誰かがわざと私の食べ物に何かしたのかもしれない。  B：今日は材料がいつもと違っているんだろう。  C：誰かがに私の食べ物に毒を入れた。 |
| ４．出勤途中で、信号のたびにすべての信号が赤になってしまうことに気づいた。  *（A、B、Cのどれかに〇をつけてください）* | A：今朝はいつもより到着までに時間がかかるな。  B：もううんざり、これで今日は本当に遅刻だなあ。  C：今日一日がもう台無しだ。 |
| ５．バス停でバスを待っていたら、半分くらい空席なのに、バスが止まらずに通り過ぎていった。  *（A、B、Cのどれかに〇をつけてください）* | A：みんなはいつもだ。  B：たまには、あまり親切でない人もいる。C：今日は、運転手の機嫌が悪かったに違  いない。 |
| ６．頭がひどく痛い。  *（A、B、Cのどれかに〇をつけてください）* | A：体に何か悪いところがあるに違いない。  B：こんなふうに私の頭が痛くなる理由はたくさんある。  C：のような重病にかかったに違いない。 |
| ７．バスに乗っていたら、知らない人が自分をじろじろ見ていることに気づいた。  *（A、B、Cのどれかに〇をつけてください）* | A：そんなふうにじろじろ見られると少し心配になる。  B：そんなふうにじろじろ見るのは、私に危害を加えようとしているに違いない。  C：そんなふうにじろじろ見るのは本当に失礼だ。 |
| ８．家でくつろいでいたら、突然変な感じに襲われた。  *（A、B、Cのどれかに〇をつけてください）* | A：どうしてこんな変な感じがするんだろう。どこかで悪いことが起きているんだろうか。  B：この感じは、私の知り合いの誰かに、どこかで何か悪いことが起きている証拠だ。  C：疲れすぎか何かのせいに違いない。 |
| ９．ある仕事に応募したがうまくいかなかった。  *（A、B、Cのどれかに〇をつけてください）* | A:なぜその仕事につけなかったのか、何か意見をもらうことができるかもしれない。  B：私が面接でうまくできなかったからだと思う。  C：これから先も絶対就職できない。 |
| １０．電車に乗っていたら、突然、昔その場所に行ったことがあるという強い感じが生じた。  *（A、B、Cのどれかに〇をつけてください）* | A：これは、何か恐ろしいことが起きたか、これから起きるという予感なんだ。  B：これは何かの予感だろうか。  C：不思議な感じだが、誰にでもよくあることだ。 |
| １１．好きな人（あるいは友だち）に一緒に出かけようと言ったら断られた。  *（A、B、Cのどれかに〇をつけてください）* | A：私はこうやって拒否されることがかなり多い。  B：うまくいくときもあれば、いかないときもある。  C：私は何をしようとしても、いつも拒否される。 |
| １２．ある日、店に入ったら、中にいる人たちが笑っているのが聞こえた。  *（A、B、Cのどれかに〇をつけてください）* | A：私のことを笑っているに違いない。  B：私のことを笑っているのかな。  C：あの笑い声は多分私のこととは関係ない。 |
| １３．家の外にパトカーが数台とまっていた。突然、落ち着かない気持ちになった。  *（A、B、Cのどれかに〇をつけてください）* | A：警官っていうのは、見ただけでも人をこんなにも落ち着かなくさせるんだから、おかしなものだ。  B：なぜ落ち着かない気持ちになったんだろう。パトカーは私と関係があるのだろうか。  C：こんなに落ち着かなくなるなんて、何か悪いことをしでかしたに違いない。警官は私をつかまえに来たのだ。 |
| １４．テレビを観ていたら、突然画面が真っ黒になった。  *（A、B、Cのどれかに〇をつけてください）* | A：不気味なことがいつも起きる。  B：こういうことがに起きる気がする。  C：今日はテレビの調子が悪いに違いない。 |
| １５．スーパーのレジに並んでいたら、前に並んでいた二人連れが、同時に自分のほうを見て、その後すぐに二人で話し始めた。  *（A、B、Cのどれかに〇をつけてください）* | A：こういうことは初めてじゃない。  B：並んでいればこういうこともあるさ。  C：自分が行く先々で、こういうことがいつも起きる。 |
| １６．喫茶店で知り合いと待ち合わせしているとき、自分の内側から、奇妙な、える感じが突然起きた。  *（A、B、Cのどれかに〇をつけてください）* | A：える感じは悪いことが起きるだから、その人とは会うべきではない。  B：その人に会うことで神経質になっているに違いない。  C：える感じは、何か悪いことが起きるという意味かもしれない。 |
| １７．誰もいない部屋の壁を、何かの影が横切っていった。  *（A、B、Cのどれかに〇をつけてください）* | A：あれはなんだったんだろう？  B：目のに違いない  C：人か何かがいたに違いない。 |
| １８．電話が鳴ったので出て返事をしたら、急に切れてしまった。  *（A、B、Cのどれかに〇をつけてください）* | A：これは何かあやしいな。  B：誰かが絶対に私の様子を探っている。  C：おそらく間違い電話だな。 |
| １９．最近起きた災害のニュースをテレビで観ていたら、申し訳ない気持ちになった。  *（A、B、Cのどれかに〇をつけてください）* | A:申し訳ない気持ちになるということは、私に何か責任があるに違いない。  B：誰かに災害が起きたら、申し訳ない気持ちになるのはふつうのことだ。  C：なぜ申し訳ない気持ちになったのかわからないけれど、気づいていないだけで、私に何か責任があるのかもしれない。 |
| ２０．ラジオを聴いていたら、バチバチという雑音が突然聞こえた。  *（A、B、Cのどれかに〇をつけてください）* | A：周波数がピタッと合わないように、誰かがわざと私のラジオに細工したんだ。  B：誰かが私のラジオをいじくったのかな。  C：電波障害のせいだろう。 |
| ２１．電車に乗っているとき、後ろの席の2人が自分のことを話しているのが聞こえたと思った。しかし、振り返ってみると、2人は新聞を読んでいて話はしていなかった。  *（A、B、Cのどれかに〇をつけてください）* | A：彼らは絶対に私のことを話していた。新聞を読むふりをしているだけだ。  B：彼らが私のことを話しているのが聞こえたはずなんだけど、思い過ごしだったのかもしれない。  C：実際に何があったのかを決めつける前に、他の人も同じような体験をしたことがあるか聞いてみるべきだ。 |
| ２２．自宅にいるとき、それまでは静かだったのに、壁を激しく叩く音が急に聞こえた。  *（A、B、Cのどれかに〇をつけてください）* | A：隣の人が、私を怒らせるためにわざと壁を叩いている。  B：隣の人が、家の修理か何かをしているのだろう。  C：隣の人が、私に何かを伝えようとしているのかもしれない。 |
| ２３．新聞（あるいは雑誌）を読んでいると、自分に特別に関係した記事を見つけた。  *（A、B、Cのどれかに〇をつけてください）* | A：この記事は、私のような人を想定して書かれたのだろう。  B：この記事は、誰かが私のために書いたのかもしれない。  C：この記事は、間違いなく、誰かが私のために特別に書いたのだ。 |
| ２４．知らない人が自分を見ているのに気づいたら、急に落ち着かない気持ちになった。  *（A、B、Cのどれかに〇をつけてください）* | A：この落ち着かない感じからすると、あの人は私に危害を加えるつもりだ。  B：どうしてこんなに落ち着かないんだろう。あの人が、私のことを悪く思っているという意味なんだろうか？  C：誰かに見られていれば、たいていの人は落ち着かなくなるものだ。このことについては心配しないようにしよう。 |
| ２５．夜、自分の部屋に1人でいたら、別の部屋のドアがひとりでにバタンと音を立てて閉まった。  *（A、B、Cのどれかに〇をつけてください）* | A：誰かが（あるいは何かが）家の中に入ってきたに違いない。  B：誰かが（あるいは何かが）いるんだろうか。  C：たぶん風だろう。 |
| ２６．知り合いのことを考えていたら、ちょうどその人から電話がかかってきた。受話器を取ったら、突然落ち着かない気持ちになった。  *（A、B、Cのどれかに〇をつけてください）* | A：落ち着かない気持ちになるなんて変だけど、あまり深く考えないようにしよう。  B：どうして落ち着かないんだろう。この電話に何か特別な意味があるのかなあ。  C：落ち着かない気持ちになるというのは、悪い知らせに違いない。 |
| ２７．道を歩いていたら、従業員募集のポスターが貼られているのに突然気づいた。そのポスターは特別に目立っているように見えた。  *（A、B、Cのどれかに〇をつけてください）* | A：どうしてそのポスターに目が引き付けられたんだろうか。  B：私が仕事でうまくいっていないから、それが目につくのかもしれない。  C：それは私が人生に失敗しているというサインだ。 |
| ２８．バスに乗っていたら、運転手が急停車を繰り返して、そのたびによろめいてしまった。  *（A、B、Cのどれかに〇をつけてください）* | A：運転手は乗客への嫌がらせのためにわざとそうしているのだろうか。  B：この運転手は運転がヘタだ。  C：この運転手は私に恥をかかせようとしてわざとそうしている。 |
| ２９．友だちがパーティを開くということを耳にしたけれど、自分は誘われなかった。  *（A、B、Cのどれかに〇をつけてください）* | A：私が考えていたほどには、みんなは私のことを好きでないのかもしれない。  B：あれこれ考える前に、もう少し情報を集めてもいいかもしれない。  C：私が彼らに好かれていないのは明らかだ。 |
| ３０．テレビを観ながらソファでうとうとしていたら、突然びくっとして目がさめた。  *（A、B、Cのどれかに〇をつけてください）* | A：私は、うとうとしていると、いつもびくっとして目をさます。  B：テレビのせいで目がさめたんだろう  C：もう絶対に眠れない。 |

ご記入、ありがとうございました
